# Supplementary material for: Insights into serum metabolic biomarkers for early detection of incident diabetic kidney disease in Chinese patients with type 2 diabetes by random forest
Source: publisher site journal article supplement (doi:10.18632/aging.205542), 2024-02-12
Supplement: Supplementary file [file aging-v16i4-205542-supplementary-material-SD3.pdf]

## SUPPLEMENTARY TABLES

**Supplementary Table 1. Prevalence of microvascular and macrovascular complications in the patients with type 2 diabetes ( $n = 164$ ) in each cohort.**

|                       | Diabetic retinopathy | Diabetic peripheral neuropathy | Macrovascular complication | At least one complication |
|-----------------------|----------------------|--------------------------------|----------------------------|---------------------------|
| Discovery Cohort (%)  | 21                   | 38                             | 43                         | 58                        |
| Validation Cohort (%) | 54                   | 63                             | 54                         | 84                        |
| Overall (%)           | 32                   | 46                             | 46                         | 67                        |

**Supplementary Table 3. The stability of relative ion abundance of internal standards in serum of subject samples and QC samples and overall features in QC samples.**

| Internal standards in serum of subject samples and QC samples |                |                                      |                      |                                                      |                                                      |                                             |                                             |
|---------------------------------------------------------------|----------------|--------------------------------------|----------------------|------------------------------------------------------|------------------------------------------------------|---------------------------------------------|---------------------------------------------|
| Internal standards                                            | Dataset        | Adduct                               | Retention time (min) | Detected m/z                                         | Theoretical m/z                                      | CV (%) of subject samples                   | CV (%) of quality control samples           |
| L-Tryptophan-(indole-D <sub>5</sub> )                         | Discovery set  | (M-H) <sup>-</sup>                   | 2.95                 | 208.1137                                             | 208.1140                                             | 18.04                                       | 2.16                                        |
|                                                               | Validation set | (M-H) <sup>-</sup>                   | 2.96                 | 208.1142                                             | 208.1140                                             | 27.08                                       | 1.61                                        |
|                                                               | Discovery set  | (M+H) <sup>+</sup>                   | 2.95                 | 210.1285                                             | 210.1285                                             | 4.24                                        | 2.43                                        |
|                                                               | Validation set | (M+H) <sup>+</sup>                   | 2.96                 | 210.1279                                             | 210.1285                                             | 12.14                                       | 4.28                                        |
| Cholic acid D <sub>4</sub>                                    | Discovery set  | (M-H) <sup>-</sup>                   | 5.73                 | 411.3054                                             | 411.3054                                             | 3.31                                        | 2.74                                        |
|                                                               | Discovery set  | (M+H-3H <sub>2</sub> O) <sup>+</sup> | 5.74                 | 359.2878                                             | 359.2882                                             | 4.10                                        | 1.99                                        |
|                                                               | Validation set | (M-H) <sup>-</sup>                   | 5.72                 | 411.3059                                             | 411.3054                                             | 3.44                                        | 1.31                                        |
|                                                               | Validation set | (M+H-3H <sub>2</sub> O) <sup>+</sup> | 5.73                 | 359.2870                                             | 359.2882                                             | 9.82                                        | 2.84                                        |
| cis-10-nonadecenoic acid                                      | Discovery set  | (M-H) <sup>-</sup>                   | 13.68                | 295.2642                                             | 295.2643                                             | 29.61                                       | 15.28                                       |
|                                                               | Validation set | (M-H) <sup>-</sup>                   | 13.85                | 295.2647                                             | 295.2643                                             | 25.67                                       | 11.37                                       |
| Overall features in QC samples                                |                |                                      |                      |                                                      |                                                      |                                             |                                             |
| Dataset                                                       | ESI mode       | QC samples ( $n$ )                   | Total features       | Number of features with RSD $\leq$ 30% in QC samples | Number of features with RSD $\leq$ 20% in QC samples | Percentage in all features (RSD $\leq$ 30%) | Percentage in all features (RSD $\leq$ 20%) |
| Discovery set                                                 | -              | 22                                   | 5234                 | 4316                                                 | 3596                                                 | 82.46                                       | 68.70                                       |
|                                                               | +              | 25                                   | 4701                 | 3164                                                 | 2368                                                 | 67.30                                       | 50.37                                       |
| Validation set                                                | -              | 12                                   | 8302                 | 7249                                                 | 6255                                                 | 87.32                                       | 75.34                                       |
|                                                               | +              | 12                                   | 12802                | 10279                                                | 8125                                                 | 80.29                                       | 63.47                                       |

**Supplementary Table 4. Identification details and stability of metabolites in QC samples using UPLC-Orbitrap-MS.**

| Identified metabolites | Retention time (min) | Detected m/z | Theoretical m/z | Mass error (ppm) | Adduct              | Molecular formula                                            | Confirmation/Supplier*   | CV of QC (%)  |                |
|------------------------|----------------------|--------------|-----------------|------------------|---------------------|--------------------------------------------------------------|--------------------------|---------------|----------------|
|                        |                      |              |                 |                  |                     |                                                              |                          | Discovery set | Validation set |
| L-Arginine             | 0.67                 | 173.1042     | 173.1044        | 0.6              | (M-H) <sup>-</sup>  | C <sub>6</sub> H <sub>14</sub> N <sub>4</sub> O <sub>2</sub> | Sigma Aldrich            | 10.17         | 8.58           |
| L-Ornithine            | 0.67                 | 131.0823     | 131.0826        | 0                | (M-H) <sup>-</sup>  | C <sub>5</sub> H <sub>12</sub> N <sub>2</sub> O <sub>2</sub> | Sigma Aldrich            | 11.08         | 5.23           |
| Choline                | 0.78                 | 104.1071     | 104.1070        | -2.9             | (M) <sup>+</sup>    | C <sub>5</sub> H <sub>14</sub> NO                            | Acros Organics           | 4.67          | 5.48           |
| L-Glutamine            | 0.79                 | 145.0616     | 145.0619        | 0.0              | (M-H) <sup>-</sup>  | C <sub>5</sub> H <sub>10</sub> N <sub>2</sub> O <sub>3</sub> | Sigma Aldrich            | 1.08          | 1.25           |
| L-Citrulline           | 0.80                 | 174.0882     | 174.0884        | 0.6              | (M-H) <sup>-</sup>  | C <sub>6</sub> H <sub>13</sub> N <sub>3</sub> O <sub>3</sub> | Sigma Aldrich            | 2.26          | 3.29           |
| D-Glucose              | 0.80                 | 215.0328     | 215.0328        | 1.4              | (M+Cl) <sup>-</sup> | C <sub>6</sub> H <sub>12</sub> O <sub>6</sub>                | International laboratory | 1.14          | 0.68           |
| L-Carnitine            | 0.80                 | 162.1125     | 162.1125        | -3.1             | (M+H) <sup>+</sup>  | C <sub>7</sub> H <sub>15</sub> N <sub>3</sub> O <sub>3</sub> | CIL                      | 1.50          | 3.63           |
| L-Glutamic acid        | 0.80                 | 148.0604     | 148.0604        | -2.7             | (M+H) <sup>+</sup>  | C <sub>5</sub> H <sub>9</sub> N <sub>3</sub> O <sub>4</sub>  | Sigma Aldrich            | 3.80          | 4.09           |

|                                            |      |          |          |      |                     |            |                           |       |       |
|--------------------------------------------|------|----------|----------|------|---------------------|------------|---------------------------|-------|-------|
| <b>L-Threonine</b>                         | 0.80 | 120.0655 | 120.0655 | -2.5 | (M+H) <sup>+</sup>  | C4H9NO3    | Sigma Aldrich             | 6.47  | 5.57  |
| <b>Arabinose isomer</b>                    | 0.80 | 195.0513 | 195.0510 | 1.5  | (M+FA-H)<br>-       | C5H10O5    | Santa Cruz                | 1.46  | 1.88  |
| <b>Betaine</b>                             | 0.81 | 118.0863 | 118.0863 | -3.4 | (M+H) <sup>+</sup>  | C5H11NO2   | Sigma Aldrich             | 1.70  | 3.06  |
| <b>Creatinine</b>                          | 0.81 | 114.0662 | 114.0662 | -2.6 | (M+H) <sup>+</sup>  | C4H7N3O    | Acros Organics            | 2.24  | 3.93  |
| <b>2-Hydroxyethanesulfonate</b>            | 0.82 | 124.9911 | 124.9914 | 0.0  | (M-H) <sup>-</sup>  | C2H6O4S    | Sigma Aldrich             | 3.78  | 8.46  |
| <b>γ-Butyrobetaine</b>                     | 0.83 | 146.1175 | 146.1176 | -3.4 | (M+H) <sup>+</sup>  | C7H15NO2   | TRC                       | 3.76  | 2.37  |
| <b>L-Proline</b>                           | 0.83 | 116.0707 | 116.0706 | -2.6 | (M+H) <sup>+</sup>  | C5H9NO2    | Sigma Aldrich             | 1.56  | 3.69  |
| <b>1,5-Anhydro-D-glucitol</b>              | 0.85 | 199.0376 | 199.0379 | 1.0  | (M+Cl) <sup>-</sup> | C6H12O5    | TRC                       | 2.09  | 1.82  |
| <b>N-Acetylcarnosine</b>                   | 0.89 | 269.1243 | 269.1243 | -2.6 | (M+H) <sup>+</sup>  | C11H16N4O4 | Santa Cruz                | 5.91  | 7.34  |
| <b>5-Methylthio-D-ribose</b>               | 0.93 | 181.0529 | 181.0529 | -2.8 | (M+H) <sup>+</sup>  | C6H12O4S   | Online database<br>(HMDB) | 6.12  | 8.15  |
| <b>Pseudouridine</b>                       | 0.93 | 243.0622 | 243.0623 | 1.2  | (M-H) <sup>-</sup>  | C9H12N2O6  | Supelco                   | 1.78  | 3.65  |
| <b>L-Valine</b>                            | 0.94 | 118.0863 | 118.0863 | -3.4 | (M+H) <sup>+</sup>  | C5H11NO2   | Sigma Aldrich             | 1.89  | 4.29  |
| <b>L-Acetylcarnitine</b>                   | 0.95 | 204.1230 | 204.1230 | -2.9 | (M+H) <sup>+</sup>  | C9H17NO4   | CIL                       | 2.35  | 6.67  |
| <b>L,L-TMAP isomer</b>                     | 0.96 | 229.1546 | 229.1547 | -3.5 | (M+H) <sup>+</sup>  | C11H20N2O3 | ChemPartner <sup>3</sup>  | 4.05  | 6.07  |
| <b>Uric acid</b>                           | 1.00 | 169.0356 | 169.0356 | -3.0 | (M+H) <sup>+</sup>  | C5H4N4O3   | Sigma Aldrich             | 1.78  | 4.69  |
| <b>L,L-TMAP</b>                            | 1.06 | 229.1546 | 229.1547 | -3.5 | (M+H) <sup>+</sup>  | C11H20N2O3 | ChemPartner <sup>3</sup>  | 2.31  | 5.44  |
| <b>L-Methionine</b>                        | 1.07 | 148.0435 | 148.0438 | 1.8  | (M-H) <sup>-</sup>  | C5H11NO2S  | Sigma Aldrich             | 5.03  | 7.31  |
| <b>Citric acid</b>                         | 1.09 | 191.0195 | 191.0197 | 1.0  | (M-H) <sup>-</sup>  | C6H8O7     | Sigma Aldrich             | 3.55  | 3.64  |
| <b>Hydroxybutyrylcarnitine</b>             | 1.09 | 248.1491 | 248.1492 | -3.6 | (M+H) <sup>+</sup>  | C11H21NO5  | Online databases          | 11.84 | 8.58  |
| <b>Succinylcarnitine</b>                   | 1.09 | 262.1284 | 262.1285 | -3.8 | (M+H) <sup>+</sup>  | C11H19NO6  | Supelco                   | 5.29  | 11.02 |
| <b>Uracil</b>                              | 1.09 | 113.0346 | 113.0346 | -2.7 | (M+H) <sup>+</sup>  | C4H4N2O2   | Wako                      | 5.11  | 6.35  |
| <b>Uridine</b>                             | 1.09 | 243.0622 | 243.0623 | 1.2  | (M-H) <sup>-</sup>  | C9H12N2O6  | Wako                      | 1.69  | 1.14  |
| <b>L-Tyrosine</b>                          | 1.33 | 180.0664 | 180.0666 | 0.6  | (M-H) <sup>-</sup>  | C9H11NO3   | Sigma Aldrich             | 2.11  | 1.06  |
| <b>Sulfo tyrosine</b>                      | 1.46 | 260.0234 | 260.0234 | 1.9  | (M-H) <sup>-</sup>  | C9H11NO6S  | Ref <sup>4</sup>          | 1.79  | 0.88  |
| <b>Inosine</b>                             | 1.50 | 267.0735 | 267.0735 | 1.9  | (M-H) <sup>-</sup>  | C10H12N4O5 | Acros Organics            | 2.30  | 1.17  |
| <b>L-Leucine</b>                           | 1.56 | 132.1019 | 132.1019 | -3.0 | (M+H) <sup>+</sup>  | C6H13NO2   | Sigma Aldrich             | 1.81  | 6.27  |
| <b>4-Acetamidobutanoic acid</b>            | 1.59 | 144.0664 | 144.0666 | 0.7  | (M-H) <sup>-</sup>  | C6H11NO3   | Matrix Scientific         | 1.62  | 1.44  |
| <b>Propionylcarnitine</b>                  | 1.67 | 218.1387 | 218.1387 | -3.2 | (M+H) <sup>+</sup>  | C10H19NO4  | CIL                       | 2.61  | 6.39  |
| <b>2-Hydroxybutyric acid</b>               | 1.90 | 103.0398 | 103.0401 | -1.0 | (M-H) <sup>-</sup>  | C4H8O3     | Sigma Aldrich             | 1.85  | 1.35  |
| <b>2-(α-D-Mannopyranosyl)-L-tryptophan</b> | 2.21 | 367.1497 | 367.1500 | -3.8 | (M+H) <sup>+</sup>  | C17H22N2O7 | TRC                       | 2.16  | 6.02  |
| <b>L-Kynurenine</b>                        | 2.42 | 209.0921 | 209.0921 | -3.3 | (M+H) <sup>+</sup>  | C10H12N2O3 | Sigma Aldrich             | 3.00  | 8.09  |
| <b>L-Phenylalanine</b>                     | 2.48 | 164.0714 | 164.0717 | 0.6  | (M-H) <sup>-</sup>  | C9H11NO2   | Sigma Aldrich             | 2.02  | 2.36  |
| <b>Succinyladenosine</b>                   | 2.89 | 382.1005 | 382.1004 | 1.6  | (M-H) <sup>-</sup>  | C14H17N5O8 | TRC                       | 3.06  | 3.07  |
| <b>O-Adipoylcarnitine</b>                  | 2.90 | 290.1597 | 290.1598 | -3.8 | (M+H) <sup>+</sup>  | C13H23NO6  | Supelco                   | 3.39  | 5.11  |
| <b>Butyrylcarnitine</b>                    | 2.92 | 232.1543 | 232.1543 | -3.4 | (M+H) <sup>+</sup>  | C11H21NO4  | CIL                       | 2.62  | 5.65  |
| <b>L-β-aspartyl-L-leucine</b>              | 2.93 | 247.1287 | 247.1288 | -3.2 | (M+H) <sup>+</sup>  | C10H18N2O5 | Online database<br>(HMDB) | 6.71  | 4.89  |
| <b>L-Tryptophan</b>                        | 2.95 | 203.0824 | 203.0826 | 1.0  | (M-H) <sup>-</sup>  | C11H12N2O2 | Sigma Aldrich             | 2.21  | 1.26  |
| <b>Homovanillic acid sulfate</b>           | 2.97 | 261.0073 | 261.0074 | 1.9  | (M-H) <sup>-</sup>  | C9H10O7S   | Cayman Chemical           | 12.40 | 2.42  |
| <b>Kynurenic acid</b>                      | 2.99 | 190.0499 | 190.0499 | -3.2 | (M+H) <sup>+</sup>  | C10H7NO3   | Sigma Aldrich             | 14.71 | 4.95  |
| <b>2-(3-(sulfooxy)phenyl)acetic acid</b>   | 3.00 | 230.9967 | 230.9969 | 1.3  | (M-H) <sup>-</sup>  | C8H8O6S    | Online database<br>(HMDB) | 2.64  | 4.81  |
| <b>Valerylcarnitine</b>                    | 3.00 | 246.1699 | 246.1700 | -3.7 | (M+H) <sup>+</sup>  | C12H23NO4  | Cayman Chemical           | 5.96  | 7.49  |
| <b>Pyrocatechol sulfate</b>                | 3.07 | 188.9865 | 188.9863 | 1.1  | (M-H) <sup>-</sup>  | C6H6O5S    | Online database<br>(HMDB) | 2.82  | 1.57  |
| <b>α-N-Phenylacetyl-L-glutamine</b>        | 3.07 | 263.1037 | 263.1037 | 1.9  | (M-H) <sup>-</sup>  | C13H16N2O4 | Santa Cruz                | 1.87  | 1.41  |
| <b>Phenol sulfate</b>                      | 3.10 | 172.9912 | 172.9914 | 1.2  | (M-H) <sup>-</sup>  | C6H6O4S    | Online databases          | 2.32  | 0.99  |
| <b>Hexanoylcarnitine</b>                   | 3.11 | 260.1855 | 260.1856 | -3.5 | (M+H) <sup>+</sup>  | C13H25NO4  | Santa Cruz                | 28.21 | 8.88  |

|                                      |       |          |          |      |                    |            |                  |       |      |
|--------------------------------------|-------|----------|----------|------|--------------------|------------|------------------|-------|------|
| Hippuric acid                        | 3.14  | 178.0508 | 178.0510 | 0.6  | (M-H) <sup>-</sup> | C9H9NO3    | Acros Organics   | 2.03  | 0.91 |
| Indoxyl sulfate                      | 3.15  | 212.0022 | 212.0023 | 1.4  | (M-H) <sup>-</sup> | C8H7NO4S   | Sigma Aldrich    | 2.82  | 1.43 |
| <i>p</i> -Cresol glucuronide         | 3.17  | 283.0823 | 283.0823 | 1.8  | (M-H) <sup>-</sup> | C13H16O7   | TRC              | 2.09  | 1.42 |
| 2-Octenoylcarnitine                  | 3.32  | 286.2011 | 286.2013 | -3.8 | (M+H) <sup>+</sup> | C15H27NO4  | Online databases | 3.15  | 6.83 |
| <i>p</i> -Cresol sulfate             | 3.36  | 187.0070 | 187.0071 | 1.1  | (M-H) <sup>-</sup> | C7H8O4S    | CIL              | 1.82  | 1.00 |
| Indole-3-lactic acid                 | 3.44  | 204.0664 | 204.0666 | 1.0  | (M-H) <sup>-</sup> | C11H11NO3  | Santa Cruz       | 2.25  | 1.28 |
| 3-Hydroxydecanoyl carnitine          | 3.62  | 332.2429 | 332.2431 | -3.6 | (M+H) <sup>+</sup> | C17H33NO5  | Online databases | 5.28  | 5.99 |
| L-Octanoylcarnitine                  | 3.65  | 288.2167 | 288.2169 | -3.5 | (M+H) <sup>+</sup> | C15H29NO4  | CIL              | 2.63  | 5.72 |
| 3-Indoleacetic acid                  | 3.78  | 176.0706 | 176.0706 | -2.8 | (M+H) <sup>+</sup> | C10H9NO2   | Sigma Aldrich    | 3.54  | 5.14 |
| Cortisol                             | 4.03  | 363.2163 | 363.2166 | -3.6 | (M+H) <sup>+</sup> | C21H30O5   | Sigma Aldrich    | 3.00  | 3.57 |
| 9-Decenoylcarnitine                  | 4.13  | 314.2324 | 314.2326 | -3.8 | (M+H) <sup>+</sup> | C17H31NO4  | Online databases | 2.18  | 6.51 |
| Bilirubin                            | 4.30  | 585.2706 | 585.2708 | -2.7 | (M+H) <sup>+</sup> | C33H36N4O6 | Acros Organics   | 4.95  | 5.13 |
| Decanoylcarnitine                    | 4.51  | 316.2480 | 316.2482 | -3.8 | (M+H) <sup>+</sup> | C17H33NO4  | Sigma Aldrich    | 2.80  | 2.82 |
| Dehydroepiandrosterone sulfate       | 4.73  | 367.1584 | 367.1585 | 1.1  | (M-H) <sup>-</sup> | C19H28O5S  | Cayman Chemical  | 3.63  | 1.64 |
| 3,5-Tetradecadienyl carnitine        | 5.49  | 368.2793 | 368.2795 | -3.5 | (M+H) <sup>+</sup> | C21H37NO4  | Online databases | 5.88  | 6.73 |
| Dodecanoylcarnitine                  | 5.57  | 344.2793 | 344.2795 | -3.5 | (M+H) <sup>+</sup> | C19H37NO4  | CIL              | 9.44  | 4.34 |
| <i>cis</i> -5-Tetradecenoylcarnitine | 6.39  | 370.2949 | 370.2952 | -3.5 | (M+H) <sup>+</sup> | C21H39NO4  | Online databases | 12.23 | 9.59 |
| LysoPE(18:1(11Z)/0:0)                | 10.46 | 480.3083 | 480.3085 | -2.9 | (M+H) <sup>+</sup> | C23H46NO7P | Online databases | 14.54 | 9.97 |
| Stearoylcarnitine                    | 10.52 | 428.3732 | 428.3734 | -3.3 | (M+H) <sup>+</sup> | C25H49NO4  | CIL              | 16.91 | 8.10 |

\*Acros Organics, NJ, USA. Cayman Chemical, Ann Arbor, MI, USA. Abbreviation: CIL: Cambridge Isotope Laboratories, Tewksbury, MA, USA. ChemPartner, Shanghai ChemPartner Co., Ltd., China. International Laboratory, San Francisco, CA, USA. Sigma Aldrich and Supelco, St. Louis, MO, USA. Matrix Scientific, Elgin, SC, USA. Santa Cruz, Dallas, TX, USA. TRC, Toronto Research Chemicals, Canada. Wako, Wako Pure Chemical Industries, Osaka, Japan. N, N, N-trimethyl-L-alanyl-L-proline betaine (L,L-TMAP).

**Supplementary Table 7. Spearman rank correlation of metabolites with total BSA-related renal volume and renal resistive index in validation set (absolute Spearman  $R > 0.40$ ).**

| Metabolites                           | Total BSA-related renal volume         |                                        | Renal resistive index                  |
|---------------------------------------|----------------------------------------|----------------------------------------|----------------------------------------|
|                                       | Validation (Stage 0-4)<br>( $n = 58$ ) | Validation (Stage 1-4)<br>( $n = 48$ ) | Validation (Stage 1-4)<br>( $n = 48$ ) |
| MDRD eGFR                             | 0.542                                  | 0.638                                  | -0.525                                 |
| Bilirubin                             | 0.539                                  | 0.553                                  | -0.423                                 |
| Stearoylcarnitine                     | 0.430                                  | 0.469                                  | -0.148                                 |
| Ratio of tyrosine to phenylalanine    | 0.387                                  | 0.425                                  | -0.468                                 |
| L-Tryptophan                          | 0.319                                  | 0.375                                  | -0.569                                 |
| L-Tyrosine                            | 0.309                                  | 0.326                                  | -0.434                                 |
| SBP(mmHg)                             | -0.082                                 | -0.129                                 | 0.596                                  |
| N-Acetylcarnosine                     | -0.137                                 | -0.228                                 | 0.434                                  |
| Succinylcarnitine                     | -0.206                                 | -0.359                                 | 0.401                                  |
| Ratio of kynurenic acid to kynurenine | -0.234                                 | -0.309                                 | 0.499                                  |
| Citric acid                           | -0.245                                 | -0.322                                 | 0.484                                  |
| Phenol sulfate                        | -0.248                                 | -0.318                                 | 0.451                                  |
| Arabinose isomer                      | -0.264                                 | -0.402                                 | 0.607                                  |
| Indolelactic acid                     | -0.307                                 | -0.409                                 | 0.448                                  |
| 3-hydroxydecanoyl carnitine           | -0.310                                 | -0.489                                 | 0.384                                  |
| Indoleacetic acid                     | -0.320                                 | -0.444                                 | 0.196                                  |
| 2-Octenoylcarnitine                   | -0.342                                 | -0.486                                 | 0.239                                  |

|                                              |        |        |       |
|----------------------------------------------|--------|--------|-------|
| MS-detected creatinine                       | -0.352 | -0.473 | 0.459 |
| Ratio of pseudouridine to uridine            | -0.369 | -0.528 | 0.544 |
| L,L-TMAP isomer                              | -0.376 | -0.560 | 0.495 |
| O-Adipoylcarnitine                           | -0.390 | -0.578 | 0.356 |
| Urea (mmol/L)                                | -0.391 | -0.535 | 0.554 |
| Renal resistive index                        | -0.392 | -0.392 | -     |
| 2-(3-(sulfooxy)phenyl)acetic acid            | -0.401 | -0.516 | 0.407 |
| 2-Hydroxyethanesulfonate                     | -0.429 | -0.488 | 0.503 |
| Kynurenic acid                               | -0.432 | -0.537 | 0.567 |
| Homovanillic acid sulfate                    | -0.436 | -0.547 | 0.455 |
| 4-Acetamidobutanoic acid                     | -0.440 | -0.557 | 0.494 |
| Sulfotyrosine                                | -0.441 | -0.572 | 0.535 |
| Serum Creatinine (mg/dL)                     | -0.443 | -0.571 | 0.446 |
| L,L-TMAP                                     | -0.449 | -0.596 | 0.517 |
| Butyrylcarnitine                             | -0.457 | -0.617 | 0.369 |
| Pseudouridine                                | -0.466 | -0.599 | 0.588 |
| 5-Methylthio-D-ribose                        | -0.475 | -0.618 | 0.466 |
| 2-( $\alpha$ -D-Mannopyranosyl)-L-tryptophan | -0.480 | -0.604 | 0.586 |
| L- $\beta$ -aspartyl-L-leucine               | -0.487 | -0.589 | 0.578 |
| Serum cystatin C (mg/L)                      | -0.503 | -0.614 | 0.544 |
| Succinyladenosine                            | -0.543 | -0.615 | 0.556 |
| L-Kynurenine                                 | -0.562 | -0.683 | 0.472 |
| Ratio of kynurenine to tryptophan            | -0.563 | -0.640 | 0.613 |

**Supplementary Table 8. Average AUC of single biomarkers for differentiation between stages in diabetic patients using RF classification in both discovery and validation sets.**

| Classification          | Dataset | RF   | MS-detected serum creatinine | Pseudouridine     | L,L-TMAP          | 2-( $\alpha$ -D-Mannopyranosyl)-L-tryptophan | Succinyladenosine |
|-------------------------|---------|------|------------------------------|-------------------|-------------------|----------------------------------------------|-------------------|
| Stage 1a vs. Stage 1b-4 | Dis     | AUC  | 0.849 $\pm$ 0.051            | 0.915 $\pm$ 0.054 | 0.898 $\pm$ 0.046 | 0.888 $\pm$ 0.066                            | 0.888 $\pm$ 0.058 |
|                         |         | Sens | 0.721 $\pm$ 0.118            | 0.933 $\pm$ 0.053 | 0.810 $\pm$ 0.066 | 0.832 $\pm$ 0.120                            | 0.832 $\pm$ 0.059 |
|                         |         | Spec | 0.876 $\pm$ 0.120            | 0.688 $\pm$ 0.148 | 0.902 $\pm$ 0.132 | 0.753 $\pm$ 0.156                            | 0.791 $\pm$ 0.158 |
|                         | Val     | AUC  | 0.879 $\pm$ 0.078            | 0.915 $\pm$ 0.054 | 0.810 $\pm$ 0.066 | 0.893 $\pm$ 0.065                            | 0.923 $\pm$ 0.050 |
|                         |         | Sens | 0.920 $\pm$ 0.100            | 0.933 $\pm$ 0.053 | 0.902 $\pm$ 0.132 | 0.852 $\pm$ 0.074                            | 0.866 $\pm$ 0.067 |
|                         |         | Spec | 0.674 $\pm$ 0.183            | 0.688 $\pm$ 0.148 | 0.939 $\pm$ 0.022 | 0.806 $\pm$ 0.252                            | 0.824 $\pm$ 0.179 |
| Stage 1a vs. Stage 1b-2 | Dis     | AUC  | 0.754 $\pm$ 0.080            | 0.867 $\pm$ 0.072 | 0.848 $\pm$ 0.057 | 0.811 $\pm$ 0.074                            | 0.816 $\pm$ 0.065 |
|                         |         | Sens | 0.643 $\pm$ 0.102            | 0.881 $\pm$ 0.089 | 0.751 $\pm$ 0.078 | 0.840 $\pm$ 0.093                            | 0.688 $\pm$ 0.122 |
|                         |         | Spec | 0.805 $\pm$ 0.162            | 0.696 $\pm$ 0.138 | 0.812 $\pm$ 0.176 | 0.704 $\pm$ 0.145                            | 0.807 $\pm$ 0.167 |
|                         | Val     | AUC  | 0.763 $\pm$ 0.109            | 0.757 $\pm$ 0.078 | 0.774 $\pm$ 0.115 | 0.780 $\pm$ 0.099                            | 0.857 $\pm$ 0.066 |
|                         |         | Sens | 0.909 $\pm$ 0.115            | 0.651 $\pm$ 0.142 | 0.864 $\pm$ 0.121 | 0.672 $\pm$ 0.141                            | 0.819 $\pm$ 0.143 |
|                         |         | Spec | 0.636 $\pm$ 0.209            | 0.760 $\pm$ 0.243 | 0.494 $\pm$ 0.209 | 0.794 $\pm$ 0.234                            | 0.730 $\pm$ 0.173 |
| Stage 1b vs. Stage 2    | Dis     | AUC  | 0.681 $\pm$ 0.094            | 0.741 $\pm$ 0.079 | 0.680 $\pm$ 0.078 | 0.707 $\pm$ 0.097                            | 0.777 $\pm$ 0.069 |
|                         |         | Sens | 0.785 $\pm$ 0.177            | 0.679 $\pm$ 0.108 | 0.518 $\pm$ 0.127 | 0.687 $\pm$ 0.180                            | 0.556 $\pm$ 0.121 |
|                         |         | Spec | 0.447 $\pm$ 0.187            | 0.772 $\pm$ 0.153 | 0.760 $\pm$ 0.185 | 0.598 $\pm$ 0.190                            | 0.816 $\pm$ 0.170 |
|                         | Val     | AUC  | 0.600 $\pm$ 0.170            | 0.982 $\pm$ 0.031 | 0.668 $\pm$ 0.156 | 0.870 $\pm$ 0.092                            | 0.889 $\pm$ 0.078 |
|                         |         | Sens | 0.480 $\pm$ 0.238            | 0.900 $\pm$ 0.100 | 0.478 $\pm$ 0.245 | 0.842 $\pm$ 0.258                            | 0.766 $\pm$ 0.221 |
|                         |         | Spec | 0.684 $\pm$ 0.266            | 0.916 $\pm$ 0.150 | 0.778 $\pm$ 0.257 | 0.792 $\pm$ 0.152                            | 0.802 $\pm$ 0.189 |
| Stage 1 vs. Stage 2-4   | Dis     | AUC  | 0.918 $\pm$ 0.028            | 0.935 $\pm$ 0.035 | 0.906 $\pm$ 0.038 | 0.935 $\pm$ 0.026                            | 0.899 $\pm$ 0.038 |

|                         |     |      |                |               |                |               |               |
|-------------------------|-----|------|----------------|---------------|----------------|---------------|---------------|
| Stage 1-2 vs. Stage 3-4 | Val | Sens | 0.724 ± 0.071  | 0.874 ± 0.058 | 0.782 ± 0.057  | 0.778 ± 0.064 | 0.787 ± 0.059 |
|                         |     | Spec | 0.907 ± 0.095  | 0.905 ± 0.083 | 0.939 ± 0.081  | 0.920 ± 0.098 | 0.902 ± 0.092 |
|                         |     | AUC  | 0.927 ± 0.048  | 0.994 ± 0.010 | 0.928 ± 0.046  | 0.954 ± 0.034 | 0.971 ± 0.031 |
|                         | Dis | Sens | 0.811 ± 0.081  | 0.966 ± 0.036 | 0.784 ± 0.085  | 0.939 ± 0.094 | 0.931 ± 0.079 |
|                         |     | Spec | 0.910 ± 0.145  | 0.976 ± 0.063 | 0.929 ± 0.141  | 0.857 ± 0.083 | 0.925 ± 0.106 |
|                         |     | AUC  | 0.950 ± 0.025  | 0.982 ± 0.021 | 0.969 ± 0.020  | 0.974 ± 0.021 | 0.958 ± 0.028 |
|                         | Val | Sens | 0.919 ± 0.079  | 0.904 ± 0.076 | 0.949 ± 0.057  | 0.923 ± 0.065 | 0.912 ± 0.075 |
|                         |     | Spec | 0.880 ± 0.080  | 0.949 ± 0.044 | 0.851 ± 0.074  | 0.898 ± 0.055 | 0.841 ± 0.077 |
|                         |     | AUC  | 0.931 ± 0.039  | 0.951 ± 0.034 | 0.915 ± 0.046  | 0.939 ± 0.039 | 0.912 ± 0.044 |
| Stage 1-3 vs. Stage 4   | Dis | Sens | 0.932 ± 0.066  | 0.905 ± 0.096 | 0.845 ± 0.111  | 0.786 ± 0.133 | 0.899 ± 0.086 |
|                         |     | Spec | 0.817 ± 0.109  | 0.883 ± 0.090 | 0.858 ± 0.088  | 0.863 ± 0.136 | 0.843 ± 0.100 |
|                         |     | AUC  | 0.989 ± 0.009  | 0.992 ± 0.020 | 0.982 ± 0.034  | 0.988 ± 0.024 | 0.993 ± 0.018 |
|                         | Val | Sens | 0.967 ± 0.074  | 0.914 ± 0.096 | 0.934 ± 0.114  | 0.926 ± 0.098 | 0.942 ± 0.093 |
|                         |     | Spec | 0.975 ± 0.015  | 0.973 ± 0.027 | 0.950 ± 0.028  | 0.973 ± 0.028 | 0.983 ± 0.015 |
|                         |     | AUC  | 0.976 ± 0.081  | 0.968 ± 0.061 | 0.984 ± 0.054  | 0.953 ± 0.055 | 0.955 ± 0.051 |
|                         | Dis | Sens | 0.952 ± 0.163  | 0.882 ± 0.168 | 0.938 ± 0.135  | 0.906 ± 0.111 | 0.886 ± 0.124 |
|                         |     | Spec | 1.000 ± <0.001 | 0.983 ± 0.022 | 1.000 ± <0.001 | 0.995 ± 0.020 | 0.987 ± 0.039 |

Data were expressed as mean ± SD. Abbreviations: Dis: discovery; Val: validation; RF: random forest; Sens: sensitivity; Spec: specificity.

**Supplementary Table 9. Multivariate linear regression analyses among biomarkers, sex and log (MDRD eGFR) trained with discovery set and tested with validation set among diabetic patients.**

| log (MDRD GFR)                                     | Discovery set          |                   |                        | Validation set |                        |
|----------------------------------------------------|------------------------|-------------------|------------------------|----------------|------------------------|
|                                                    | $\beta$                | <i>p</i> -value   | <i>R</i> <sup>2*</sup> | RMSE           | <i>R</i> <sup>2†</sup> |
| <b>Model 1</b>                                     |                        |                   | 0.9583                 | 0.0765         | 0.9709                 |
| log (MS-detected creatinine)                       | -1.25 (-1.30 to -1.20) | <i>p</i> < 0.0001 |                        |                |                        |
| sex                                                | 0.16 (0.13 to 0.19)    | 9.76E-18          |                        |                |                        |
| <b>Model 2</b>                                     |                        |                   | 0.9531                 | 0.0812         | 0.9528                 |
| log (pseudouridine)                                | -1.22 (-1.27 to -1.17) | <i>p</i> < 0.0001 |                        |                |                        |
| sex                                                | 0.02 (-0.02 to 0.05)   | 0.3352            |                        |                |                        |
| <b>Model 3</b>                                     |                        |                   | 0.9375                 | 0.0938         | 0.9569                 |
| log (L,L-TMAP)                                     | -0.95 (-1.00 to -0.91) | <i>p</i> < 0.0001 |                        |                |                        |
| sex                                                | 0.06 (0.03 to 0.10)    | 0.0009            |                        |                |                        |
| <b>Model 4</b>                                     |                        |                   | 0.8908                 | 0.1240         | 0.9116                 |
| log (succinyladenosine)                            | -0.94 (-1.01 to -0.88) | <i>p</i> < 0.0001 |                        |                |                        |
| Sex                                                | 0.01 (-0.03 to 0.06)   | 0.5662            |                        |                |                        |
| <b>Model 5</b>                                     |                        |                   | 0.8690                 | 0.1358         | 0.9499                 |
| log (2-( $\alpha$ -D-mannopyranosyl)-L-tryptophan) | -0.67 (-0.72 to 0.62)  | <i>p</i> < 0.0001 |                        |                |                        |
| sex                                                | 0.01 (-0.04 to 0.06)   | 0.6834            |                        |                |                        |

$\beta$ , unstandardized coefficient of linear regression. sex, female = 1 and male = 2. Discovery set, *n* = 106; validation set, *n* = 56. RMSE, root mean square error. \**R*<sup>2</sup> was based on the predicted log (MDRD eGFR) against actual log (MDRD eGFR) using the equation of the model and data of discovery set. †*R*<sup>2</sup> was based on the predicted log (MDRD eGFR) against actual log (MDRD eGFR) using the equation of the model of discovery set and data of validation set.

**Supplementary Table 11. Analysis of 106 follow-up patients by random forest.**

| ABCD group       |                                         | AB group         |                                         | CD group     |                                         |
|------------------|-----------------------------------------|------------------|-----------------------------------------|--------------|-----------------------------------------|
| Index            | Mean AUC and Quartile of 100 Iterations | Index            | Mean AUC and Quartile of 100 Iterations | Index        | Mean AUC and Quartile of 100 Iterations |
| Sex              | 0.5625 (0.5234–0.625)                   | Sex              | 0.6429 (0.5–0.7143)                     | Sex          | 0.5556 (0.5–0.6667)                     |
| Age              | 0.7031 (0.6445–0.7822)                  | Age              | 0.7245 (0.6327–0.8367)                  | Age          | 0.7407 (0.6327–0.8302)                  |
| eGFR             | 0.7822 (0.7031–0.8359)                  | eGFR             | 0.8367 (0.6939–0.9184)                  | SAdo         | 0.7809 (0.6975–0.858)                   |
| Pseu             | 0.8125 (0.7397–0.8867)                  | SAdo             | 0.7296 (0.6607–0.8393)                  | eGFR         | 0.7963 (0.6914–0.8704)                  |
| SAdo             | 0.8174 (0.748–0.8716)                   | Pseu             | 0.8622 (0.7245–0.9388)                  | Cr           | 0.8086 (0.7207–0.8781)                  |
| Cr               | 0.8438 (0.7925–0.8926)                  | UACR             | 0.898 (0.8367–0.9796)                   | ADT          | 0.8117 (0.713–0.9012)                   |
| ADT              | 0.8691 (0.8179–0.918)                   | Cr               | 0.9133 (0.8265–0.9796)                  | Pseu         | 0.8302 (0.7346–0.909)                   |
| UACR             | 0.8887 (0.8262–0.9185)                  | ADT              | 0.9184 (0.8673–0.9923)                  | UACR         | 0.8889 (0.7901–0.9213)                  |
| ADT+UACR         | 0.9443 (0.9141–0.9727)                  | ADT+UACR         | 0.9796 (0.9388–1)                       | SAdo+UACR    | 0.9012 (0.8194–0.9506)                  |
| UACR+ADT+SAdo+Cr | 0.9482 (0.9248–0.9805)                  | ADT+SAdo+UACR    | 0.9796 (0.9388–1)                       | ADT+UACR     | 0.9136 (0.8395–0.963)                   |
| ADT+SAdo+UACR    | 0.9502 (0.9062–0.9805)                  | UACR+ADT+Cr      | 1 (0.9592–1)                            | UACR+Pseu+Cr | 0.929 (0.8765–0.9753)                   |
|                  |                                         | UACR+ADT+Age+Sex | 1 (0.9592–1)                            | UACR+Pseu    | 0.9352 (0.8765–0.9753)                  |

Pseu:pseudouridine.

**Supplementary Table 12. Pearson correlation of MDRD GFR with three other GFRs that were calculated by the three newly reported equations.**

| GFR calculation methods                                             | Equations                                                                                                                                                                                                                                                                                                                                                                                                                                                                                     | Pearson correlation coefficients with MDRD GFR                  |
|---------------------------------------------------------------------|-----------------------------------------------------------------------------------------------------------------------------------------------------------------------------------------------------------------------------------------------------------------------------------------------------------------------------------------------------------------------------------------------------------------------------------------------------------------------------------------------|-----------------------------------------------------------------|
| <b>MDRD Study equation<sup>1</sup></b>                              | Estimated GFR = $186 \times (\text{serum creatinine})^{-1.154} \times (\text{age in years})^{-0.203} \times 0.742$ (if female) $\times 1.210$ (if African American)                                                                                                                                                                                                                                                                                                                           | –                                                               |
| <b>CKD-EPI<sub>creatinine</sub> equation<sup>2</sup></b>            | Estimated GFR = $141 \times \min(\text{serum creatinine}/\kappa, 1)^\alpha \times \max(\text{serum creatinine}/\kappa, 1)^{-1.209} \times 0.993^{\text{Age in year}} \times 1.018$ (if female) $\times 1.159$ (if black), where $\kappa$ is 0.7 for females and 0.9 for males, $\alpha$ is $-0.329$ for females and $-0.411$ for males. min indicates the minimum of ratio of serum creatinine to $\kappa$ or 1, and max indicates the maximum of ratio of serum creatinine to $\kappa$ or 1. | Discovery ( $n = 128$ ): 0.9523 Validation ( $n = 66$ ): 0.9729 |
| <b>CKD-EPI<sub>cystatin C</sub> equation<sup>2</sup></b>            | Estimated GFR = $133 \times \min(\text{serum cystatin C}/0.8, 1)^{-0.499} \times \max(\text{serum cystatin C}/0.8, 1)^{-1.328} \times 0.996^{\text{Age}} \times 0.932$ (if female), where min indicates the minimum of ratio of serum cystatin C to 0.8 or 1, and max indicates the maximum of ratio of serum cystatin C to 0.8 or 1.                                                                                                                                                         | Validation ( $n = 58$ ): 0.9468                                 |
| <b>CKD-EPI<sub>creatinine-cystatin C</sub> equation<sup>2</sup></b> | Estimated GFR = $135 \times \min(\text{serum creatinine}/\kappa, 1)^\alpha \times \max(\text{serum creatinine}/\kappa, 1)^{-0.601} \times \min(\text{serum cystatin C}/0.8, 1)^{-0.375} \times \max(\text{serum cystatin C}/0.8, 1)^{-0.711} \times 0.995^{\text{Age}} \times 0.969$ (if female) $\times 1.08$ (if black), where $\kappa$ is 0.7 for females and 0.9 for males, and $\alpha$ is $-0.207$ for males and $-0.248$ for females.                                                  | Validation ( $n = 58$ ): 0.9681                                 |

**Supplementary Table 14. Gradient diluted and corresponding concentrations of standards.**

|                                         | 100%<br>(ng/ml) | 90%<br>(ng/ml) | 80%<br>(ng/ml) | 60%<br>(ng/ml) | 50%<br>(ng/ml) | 40%<br>(ng/ml) | 20%<br>(ng/ml) | 10%<br>(ng/ml) | 8%<br>(ng/ml) | 6%<br>(ng/ml) |
|-----------------------------------------|-----------------|----------------|----------------|----------------|----------------|----------------|----------------|----------------|---------------|---------------|
| 2-(A-D-Mannopyranosyl-)<br>L-Tryptophan | 50.00           | 45.00          | 40.00          | 30.00          | 25.00          | 20.00          | 10.00          | 5.00           | 4.00          | 3.00          |
| Succinyladenosine                       | 58.00           | 52.20          | 46.40          | 34.80          | 29.00          | 23.20          | 11.60          | 5.80           | 4.64          | 3.48          |
| pseudouridine                           | 160.00          | 144.00         | 128.00         | 96.00          | 80.00          | 64.00          | 32.00          | 16.00          | 12.80         | 9.60          |

**Supplementary Table 15. Recovery rate and precision of selected metabolites.**

| Metabolite                          | Recovery rate |
|-------------------------------------|---------------|
| 2-(A-D-Mannopyranosyl-)L-Tryptophan | 83%           |
| Succinyladenosine                   | 95%           |
| pseudouridine                       | 94%           |
| Tryptophan-D5                       | 95%           |

**Supplementary Table 16. Q1/Q3 mass and MRM conditions for the selected metabolites.**

| Metabolite                              | Q1 mass<br>(Da) | Q3 mass<br>(Da) | Dwelling time<br>(msec) | Declustering<br>Potential (volts) | Collision energy<br>(volts) |
|-----------------------------------------|-----------------|-----------------|-------------------------|-----------------------------------|-----------------------------|
| 2-(A-D-Mannopyranosyl-)<br>L-Tryptophan | 367.1           | 247.1           | 100                     | 152.15                            | 19.3                        |
| Succinyladenosine                       | 384.1           | 252             | 100                     | 122.58                            | 27.09                       |
| pseudouridine                           | 245.1           | 191             | 100                     | 108.61                            | 19.97                       |
| Tryptophan-D5                           | 210             | 192             | 100                     | 61.85                             | 16.69                       |
